# Supplementary material for: Precise base editing for the in vivo study of developmental signaling and human pathologies in zebrafish
Source: eLife journal article supplement (doi:10.7554/elife.65552), 2021-02-12
Supplement: supp [file elife-65552-supp-v1.zip]

5' 3'

|                   |                                    |
|-------------------|------------------------------------|
| <i>ctnnb1</i>     | CTTACCTGGACTCAGGAATACACTCTGGGGCCA  |
| <i>tek</i>        | CTGCGGGAGCTCCAGGTGACGGTAGCGGCGGCG  |
| <i>bap1</i>       | CGGATGACTCAGCAAGAATCAGGCCAGGATCGT  |
| <i>tp53 Q21*</i>  | TCAGAAGTATTCAGCCCCCAGGTGGTGGCTCTT  |
| <i>tp53 Q170*</i> | GAGGGCAATCAGCGAGCAAATTACAAGGAAGAT  |
| <i>kras</i>       | GTACTCCTCCTGACCTGCAGTGTCCAGGATGTC  |
| <i>dmd</i>        | TGAACCCACAGGACCAATGGGAGGAAGGTTTTG  |
| <i>sod2</i>       | CCGTGGCTGTTCAGGGCTCAGGCTGGGGCTGGC  |
| <i>rb1</i>        | CCATATTCTCCATGCATGATCACAGATGGAGTTA |
| <i>nras NAA</i>   | TTCCCAACACCTCCTGCTCCCACAAACACCAGC  |
| <i>tp53 NAA</i>   | GGGCAATCAGCGAGCAAATTACAGGGAAGATAA  |
| <i>cbl</i>        | CCGGGAGTTCCAGTCTGGCATGTTGCGGTTAGG  |
